# Supplementary material for: Forward and reverse genomic screens enhance the understanding of phenotypic variation in a large Chinese rhesus macaque cohort
Source: Springer Nature journal article supplement (doi:10.1038/s41467-025-63747-x), 2025-09-30
Supplement: MOESM1 [file 41467_2025_63747_MOESM1_ESM.pdf]

## Supplemental information

### Supplemental methods

#### *Brain imaging*

Magnetic resonance imaging (MRI) and resting state functional MRI (rs-fMRI) data were acquired with a 3.0 T UMR790 MRI scanner (United Imaging, Shanghai) at KIZ. The anesthesia and scanning procedures adhered to the guidelines outlined in the US National Institutes of Health Guide for the Care and Use of Laboratory Animals and were approved by the Institutional Animal Care and Use Committee of the Kunming Institute of Zoology, CAS. Prior to scanning, the animals were premedicated with atropine (0.05 mg/kg, intramuscular) followed by ketamine (10 mg/kg, intramuscular). Anesthesia was maintained throughout the scanning procedure with continuous intravenous propofol at 15 mg/kg/h. To ensure optimal anesthesia, the levels of End-tidal carbon dioxide (ETCO<sub>2</sub>) and respiratory rate were monitored using a magnetic-resonance compatible monitoring system. Additionally, to prevent hypothermia, animals were carefully covered with a blanket during the scanning procedure.

#### *Structural MRI data acquisition and analyses*

T1-weighted images were acquired using a 3D T1-weighted fast spoiled gradient echo (gre\_fsp) sequence (voxel size = 0.5 mm isotropic, TE = 5.6 ms, TR = 13.01 ms, flip angle: 8°), while T2-weighted images were acquired using a fse\_mx sequence (voxel size = 0.5 mm isotropic, TE = 396.48 ms, TR = 3400 ms, flip angle: 59°) by using a 12-channel head coil. The structural data were processed using Analysis of Functional NeuroImages software (AFNI)<sup>1</sup>, FMRIB Software Library (FSL)<sup>2</sup>, Advanced Normalization Tools (ANTs)<sup>3</sup> and FreeSurfer<sup>4</sup>.

Firstly, the T1 image of each animal was nonlinearly registered to the NIMH Macaque Template (NMT, version 2.0)<sup>5</sup>. Then, the initial skull stripping mask and white matter mask were generated using an in-house neural network model. The T2 image was co-registered with the T1 image using a rigid-body transformation. A bias correction procedure was applied to enhance contrast by combining the T1 and T2 images. Subsequently, a customized pipeline primarily based on FreeSurfer was employed to process the T1 image, and produced white matter and gray matter surfaces. Manual examination and editing of the skull stripping and white matter masks were performed slice-by-slice along axial and coronal planes by an expert to ensure accuracy. The revised versions were used to generate the final white matter and gray matter surfaces.

The brain surfaces were further segmented into four lobes (i.e., frontal, parietal, temporal, and occipital lobes) and 88 regions per hemisphere, according to the CHARM1 and CHARM5 atlas respectively<sup>5</sup>. FreeSurfer was utilized to extract the gray matter thickness, volume, and surface area (gray matter/CSF boundary) of each lobe and region. Subcortical regions were parcellated using a SARM atlas<sup>6</sup>, encompassing 13 main nuclei and structures such as the amygdala, thalamus, and hippocampal formation (Table S11). The segmentation of subcortical regions was achieved by inversely applying the abovementioned registration matrix to the SARM atlas. The segmentation of white matter was based on the CHARM1 and CHARM5 atlas<sup>5</sup> for gray matter. The segmentation of the ventricle was conducted using the identical procedure to that employed for subcortical regions, followed by manual examination and editing if necessary. Note that the

volume of each region, including ventricles, white matter, and subcortical regions, was calculated based on the voxel count in the native space atlas.

#### *Rs-fMRI data acquisition and analyses*

Rs-fMRI images were collected using an echo planar imaging (EPI) sequence (voxel size = 1.5 mm isotropic, TE = 29 ms, TR = 1700 ms, flip angle: 80°). Each session comprised 505 EPI volumes. The first 5 volumes from each fMRI data were removed to allow the signal to reach a steady state. The reverse phase encoding data was acquired for EPI image correction. The rs-fMRI data preprocessing was performed using AFNI following a workflow as outlined in previous studies<sup>7</sup>.

For FC analyses, the data were divided into five segments, each consisting of 100 volumes. The brain was parcellated using the CHARM5 atlas and SARM atlas same to the structural data analysis. Then, the FC network was calculated for each individual. The edges of the FC network were defined as Pearson's correlation coefficients between the mean time series of all pairs of brain regions, resulting in a  $202 \times 202$  matrix. The diagonal line of the matrix was set to zero. Next, FC matrices were transformed into z-score matrices using Fisher's z-transformation to improve normality.

We performed a comprehensive analysis of functional connectivity (FC) at three hierarchical levels: whole brain, lobe, and specific brain regions. First, we calculated the whole-brain mean functional connectivity (FC) by averaging the lower triangular values of the FC matrix. For the lobe-level analysis, all brain regions were grouped into the frontal, parietal, occipital, and temporal lobes, as well as subcortical nuclei. FC at the lobe level was calculated by averaging the FC between lobes in the same hemisphere. At the regional level, functional connectivity density (FCD) for each region was calculated by averaging its connections with all other regions within the same hemisphere, with negative connections set to zero<sup>8</sup>.

#### *Group Analyses*

To evaluate the structural difference between *DISC1* p.Arg517Trp carriers and non-carriers, we conducted Generalized Linear Mixed Models (GLMMs) on measures at the global, lobe, and region levels. Notably, we found no significant lateralization differences in either the Trp-bearing macaques or Arg controls. As such, data from both the right and left hemispheres were combined to enhance statistical power and robustness in our analyses. For the structural analyses, Hemisphere was treated as a random factor. Notably, all structural data were corrected with the intracranial volume of the corresponding hemisphere. Furthermore, we analyzed the differences in FC across the whole brain using the GLMM, treating Segment as a random factor. At the lobar and regional levels, we conducted GLMMs with both Segment and Hemisphere included as random factors to account for variability across different brain segments and hemispheres.

The present study employed the network-based statistic (NBS), as described by Zalesky et al.<sup>9</sup>, to identify subnetworks or clusters of regions exhibiting differential connectivity within the intra-hemisphere network between two groups. This non-parametric statistical approach was

specifically designed to control for family-wise error resulting from multiple comparisons. Connected components of the graph were identified based on edges that surpassed a primary threshold (a series of extent values, e.g., ranging from 3.0 to 3.4), and the statistical significance of these connected components was assessed by comparing their topological extension against a null distribution generated through non-parametric permutation testing (Family-wise error rate [FWER],  $p < .05$ ). It is important to note that in the NBS analysis, the rejection of the null hypothesis occurs at the component level rather than at the individual edge level. This characteristic allows for superior statistical power compared to mass-univariate approaches. The NBS analysis was conducted using the NBS toolbox (<https://www.nitrc.org/projects/nbs/>), with all statistical analyses carried out in MATLAB R2021b. To account for potential confounding effects, Segment and Hemisphere were included as nuisance covariates. Brain results were visualized using a network surface representation based on BrainNet Viewer<sup>10</sup>.

102

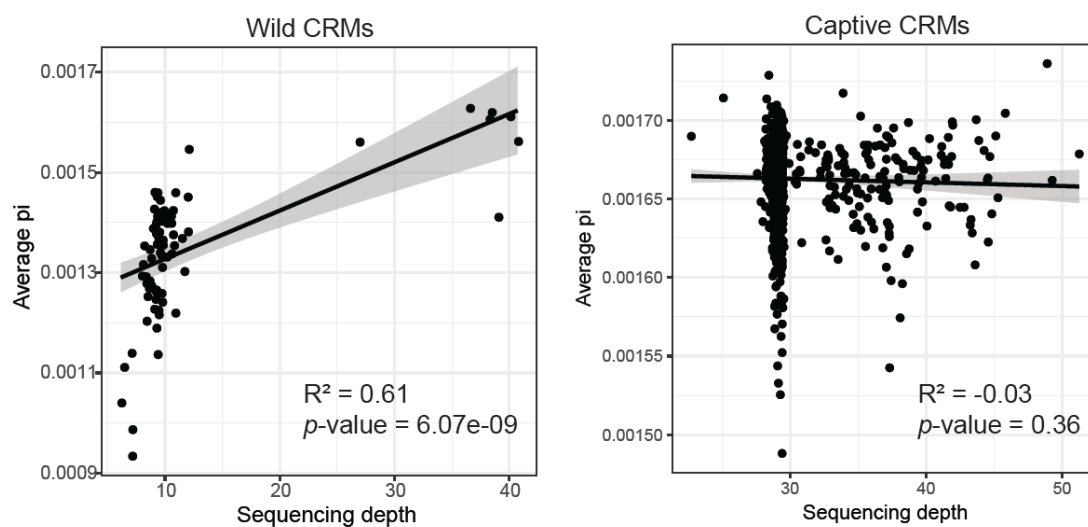

103

104

**Supplementary Fig. 1: The average of nucleotide diversity for each Wild CRMs and Captive CRMs, respectively. Source data are provided as a Source Data file.**

105

106

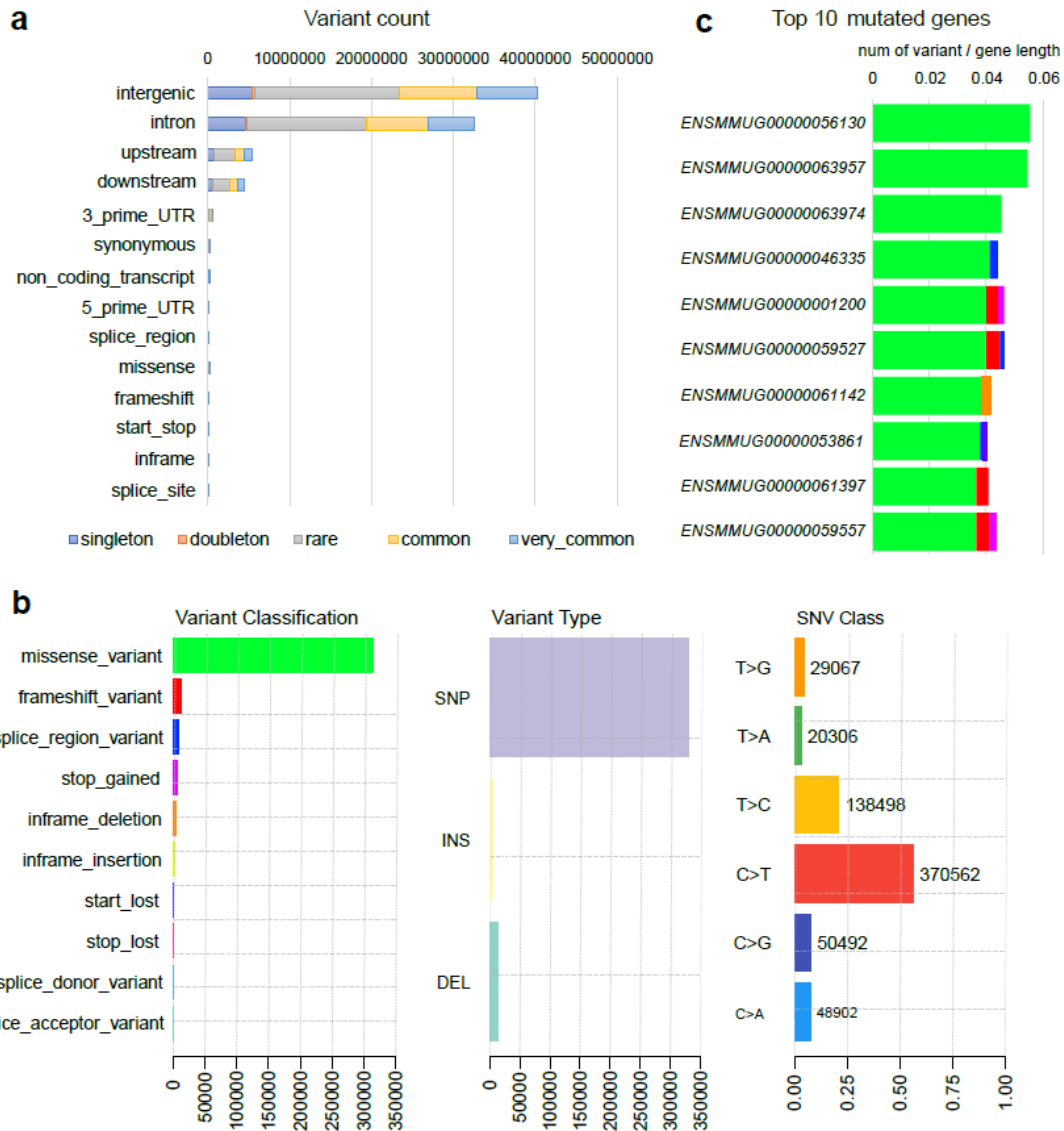

**Supplementary Fig. 2: Summary of the mutations of CRM cohort.** **a**, Variant count on the basis of variant type and allele frequency (AF). Singleton, allele count = 1; doubleton, allele count = 2; rare, allele count > 2 and AF ≤ 0.01; common, AF > 0.01 and AF ≤ 0.05; and very common, AF > 0.05. Source data are provided as a Source Data file. **b**, *Left*: histogram of the different mutation types in coding and splicing regions. *Middle*: frequency of three variant categories: SNP, insertion (INS), and deletion (DEL) in coding and splicing regions. *Right*: frequency of SNV classes. **c**, Stacked histogram of different types of mutation (color same to the left panel of Supplementary Fig. 1b) in relation to gene length. Genes were represented by Ensembl gene identifier and ordered by the number of missense variants in relation to gene length. Only the top 10 mutated genes were presented.

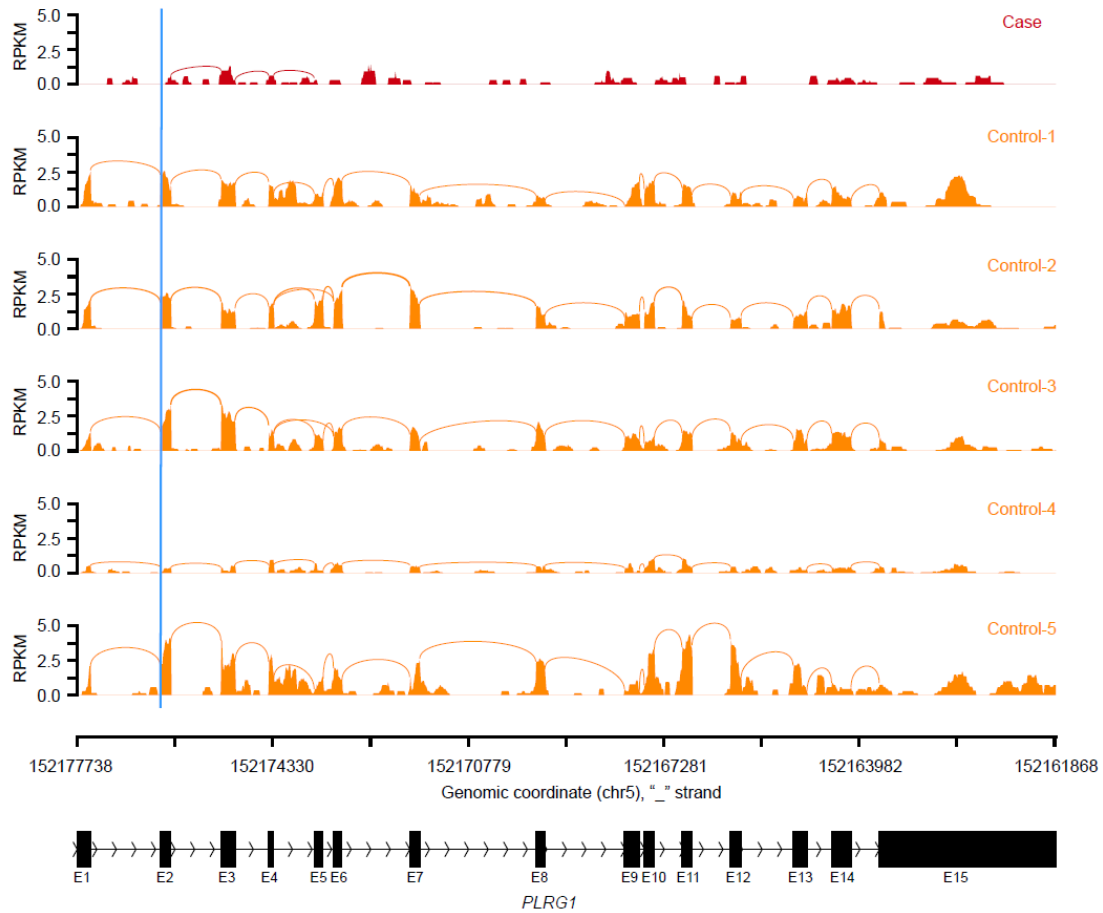

**Supplementary Fig. 3: Sashimi plot of coverage and junction reads support the splice acceptor mutation of *PLRG1* (c.10-2\_10-1insA) using transcriptome data.** The vertical blue line indicates the position of LoF mutation. The macaque possess the LoF mutation is tuna-colored, whereas the controls are salmon colored.

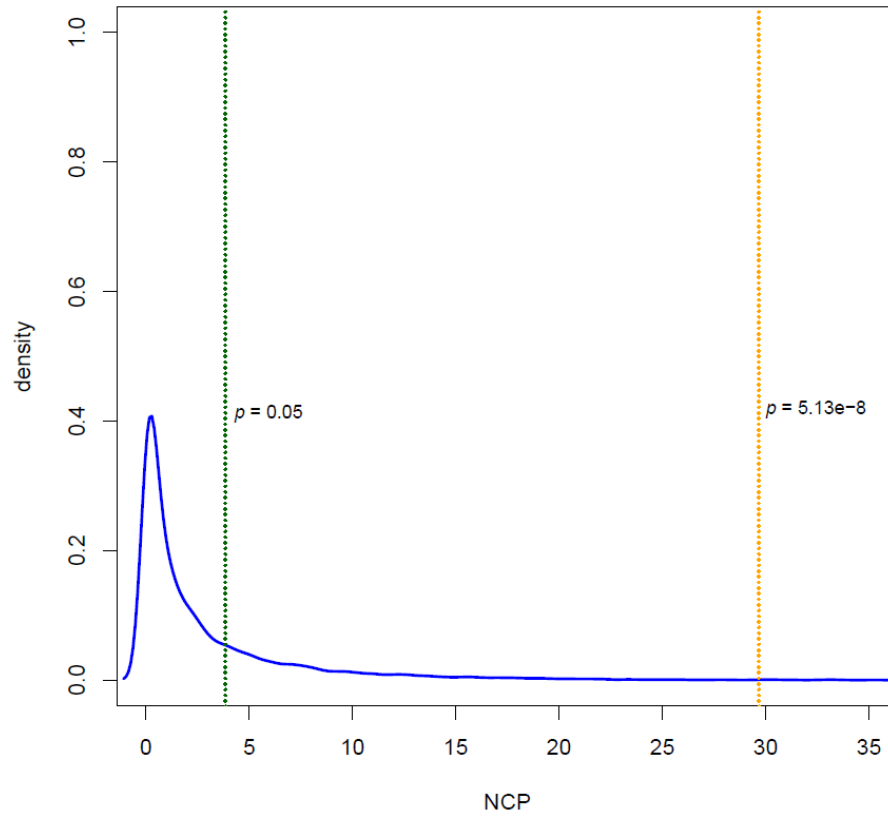

**Supplementary Fig. 4: Non-centrality parameter (NCP) distribution of  $\chi^2$  test.** The two vertical lines indicate the NCP values corresponding to the significance thresholds of  $p = 0.05$  and  $p = 5.13 \times 10^{-8}$ , respectively.

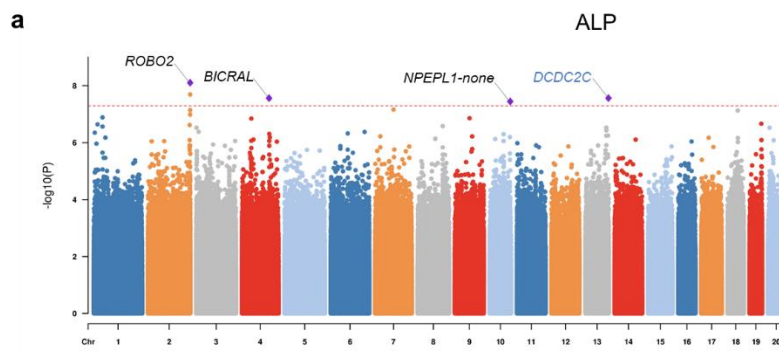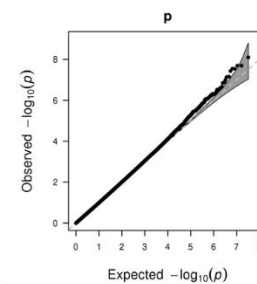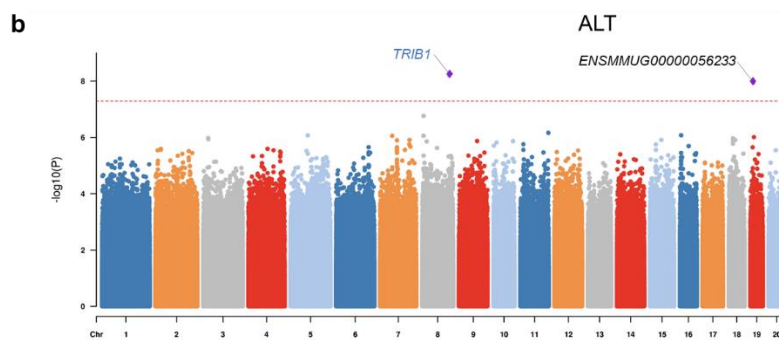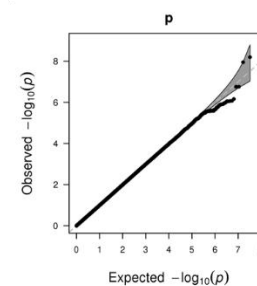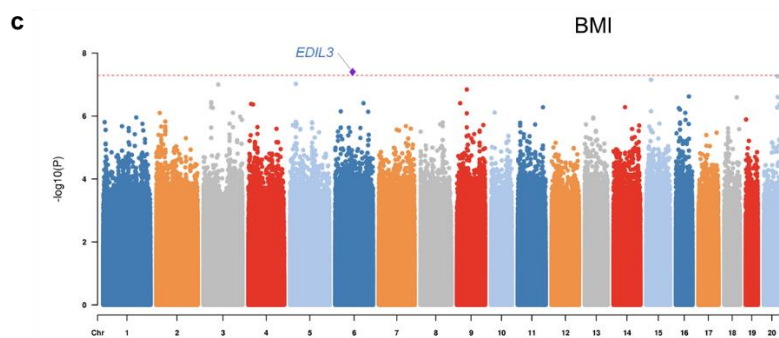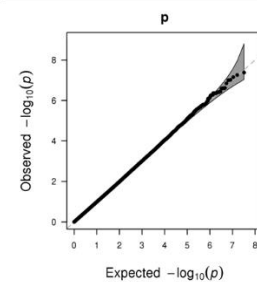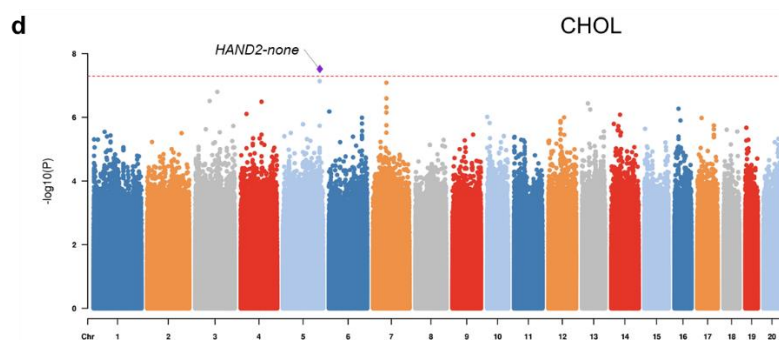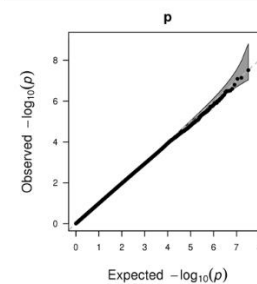



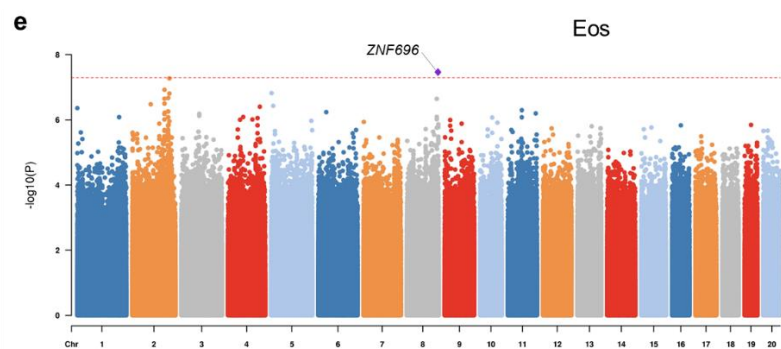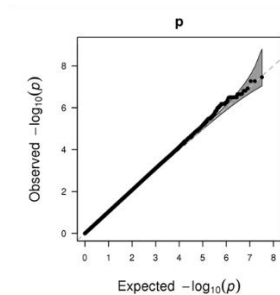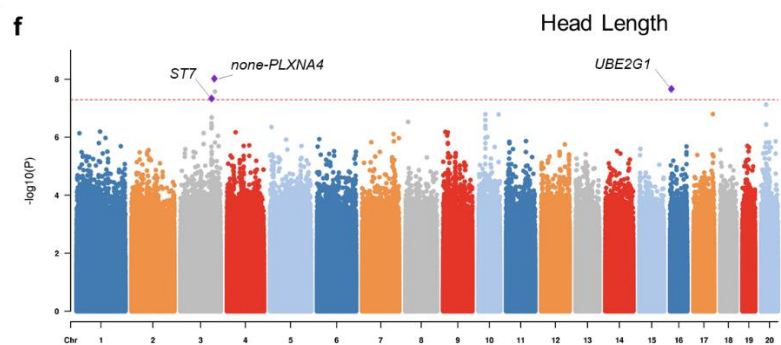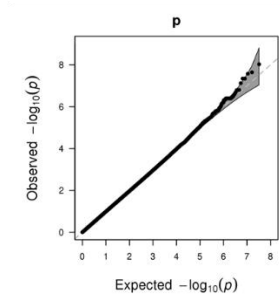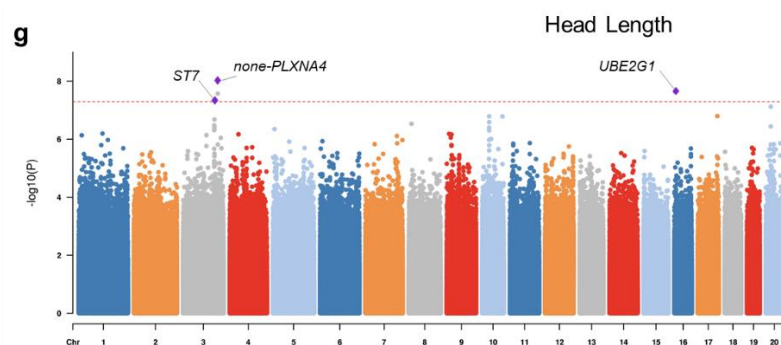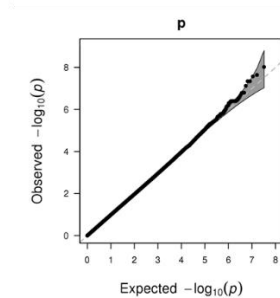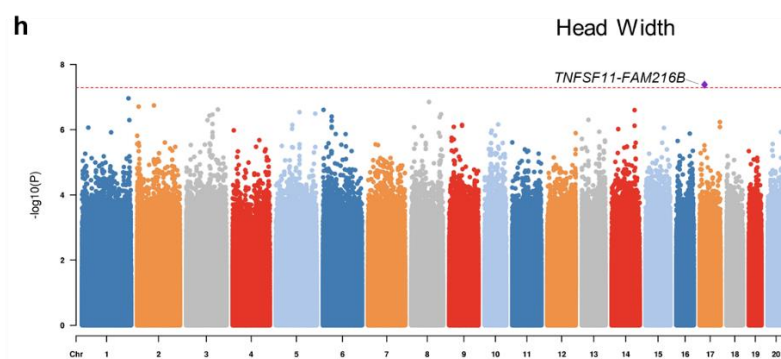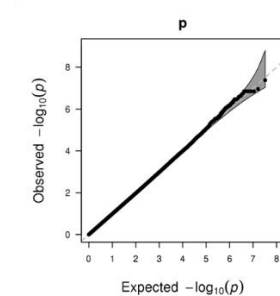

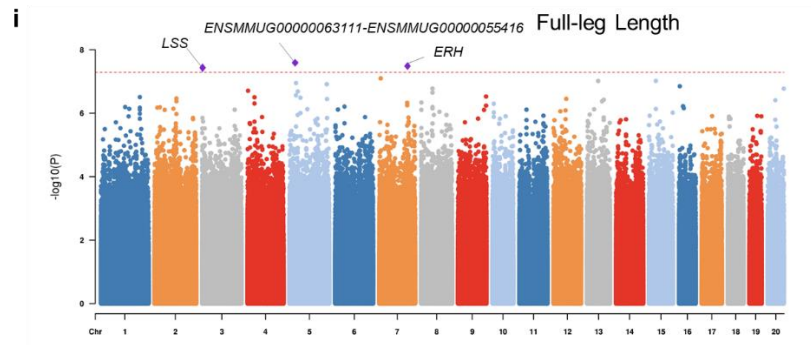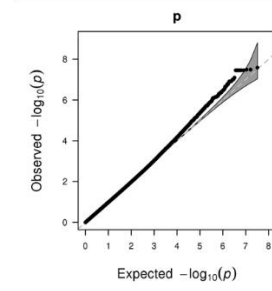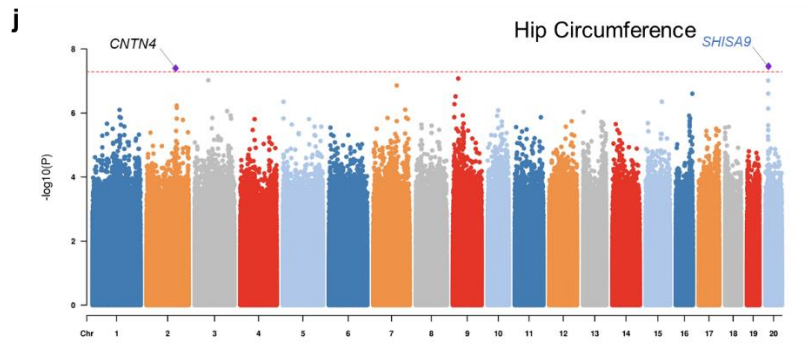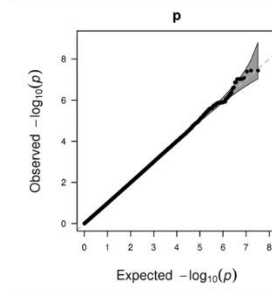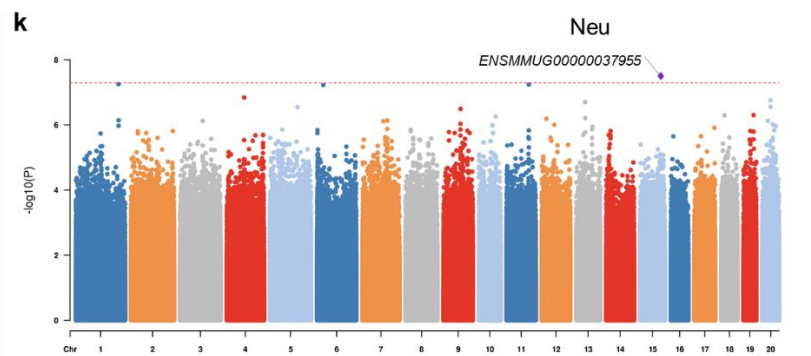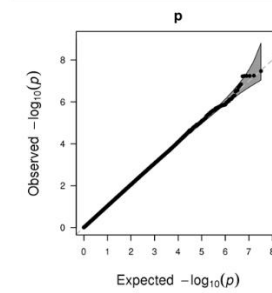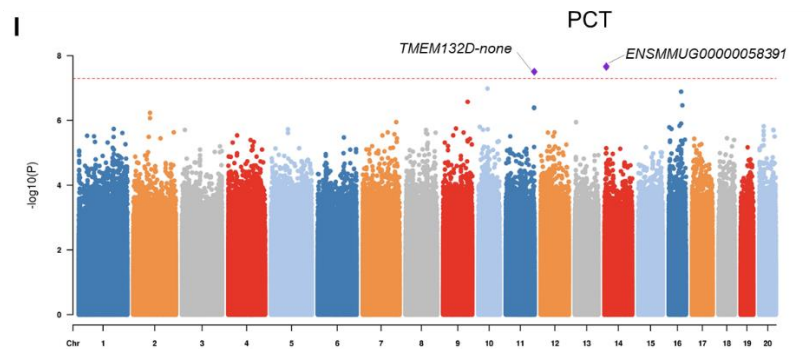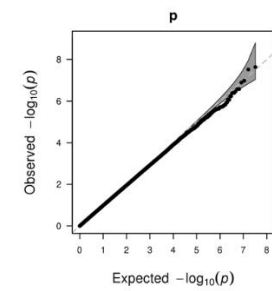

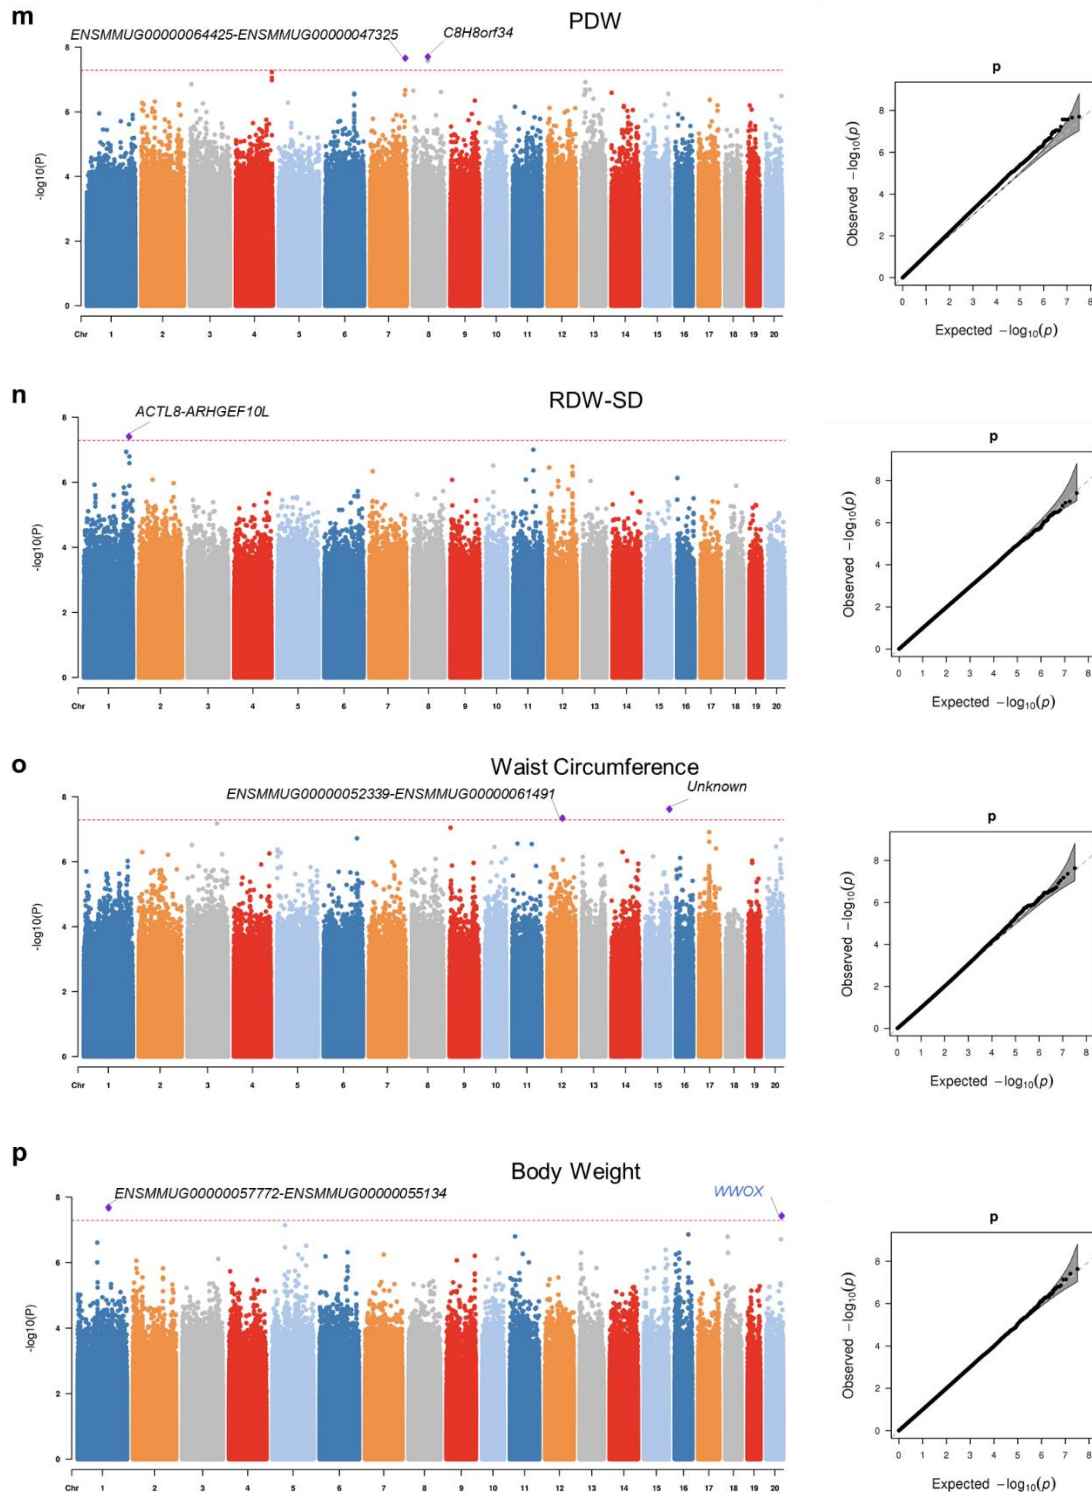

**Supplementary Fig. 5: The variants that satisfied the genome-wide significance threshold in GWAS analyses.** The purple diamond in each Manhattan plot (left) represents the independent loci that associate to the phenotype trait. Abbreviation of the hematological and biochemical traits were given in Table S6. The red dashed-line represents the genome-wide significance threshold of  $p$ -value  $< 5.13 \times 10^{-8}$ . Genes have been reported to associate with relevant human traits were highlighted in blue color. QQplots for the corresponding GWAS result were presented on the right. X-axis indicates expected  $-\log_{10} p$ -value. Y-axis indicates observed  $-\log_{10} p$ -value. Gray shaded

areas show 95% confidence intervals for the expected distributions. The summary statistics of GWAS results can be download from Non-Human Primate BioBank database (<https://nhpbiobank.kiz.ac.cn/Home/Download>).

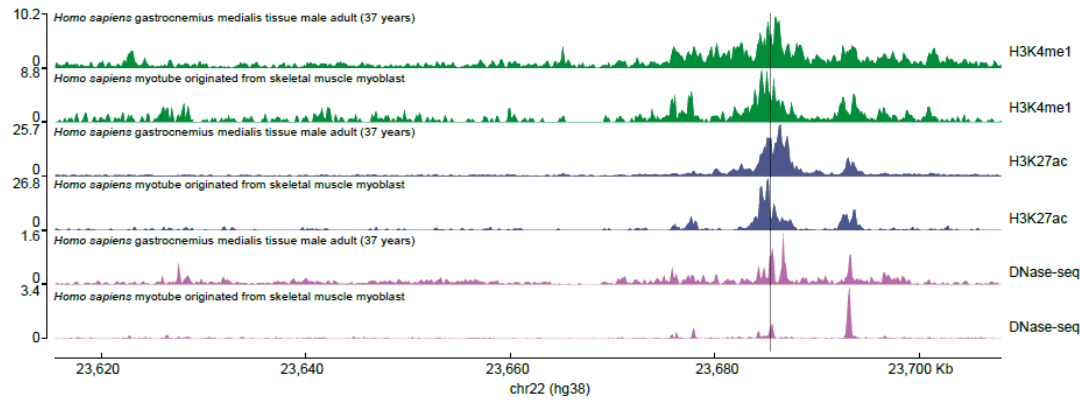

**Supplementary Fig. 6. Position of chr10:28504973 in Mmul\_10 genome exhibits distinct active enhancer signatures in several type of human cells.** The position of chr10:28504973 in Mmul\_10 genome that liftover to human coordinate (chr22:23685460) was indicated by a gray dash line. Active enhancer signatures in different cell types were defined by epigenetic marks, such as H3K4me1, H3K27ac, and DNase hypersensitivity.

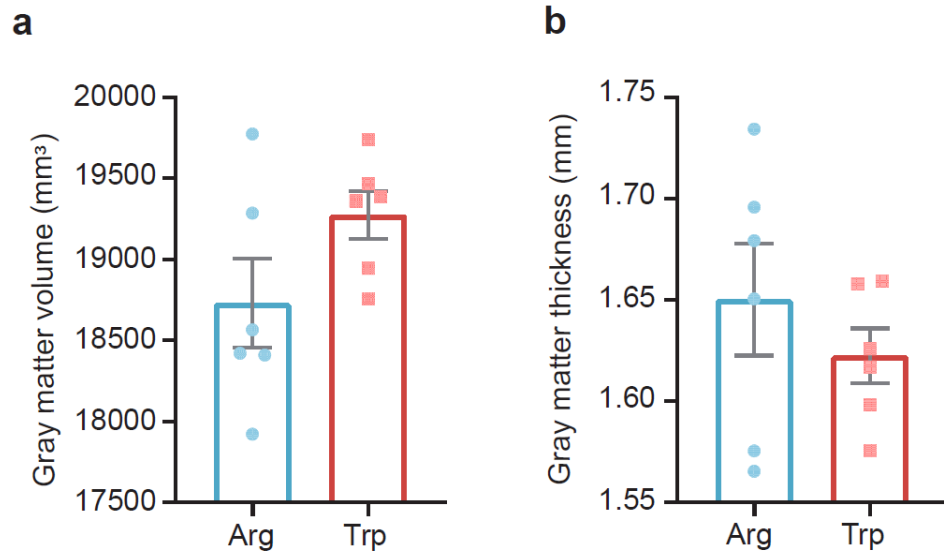

**Supplementary Fig. 7. Differences in the whole-brain gray matter. a**, Gray matter volume; and **(b)** Gray matter thickness in Trp-bearing macaques (n=3) and Arg controls (n=3). Quantitative data from each group are presented as means  $\pm$  SEM, with data collected from both hemispheres of each monkey. GLMM analyses were performed.

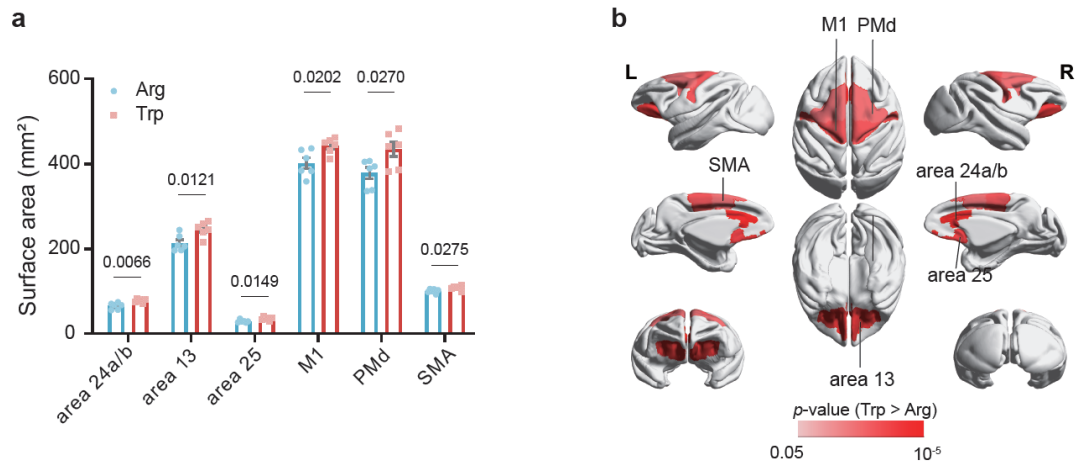

**Supplementary Fig. 8: Surface area differences in frontal regions.** **a**, Bar plots with individual data points of detail frontal brain regions exhibiting significant differences in surface area between Trp-bearing macaques (n=3) and Arg controls (n=3). **b**, Visualization of frontal brain regions showing significant differences between Trp-bearing macaques and Arg controls on the mid-gray surfaces of the macaque template. Red indicates where the surface area in Trp-bearing macaques was larger than Arg controls. The significance of structural difference at region level were measured using GLMMs and all structural data were corrected with the intracranial volume of the corresponding hemisphere. Quantitative data from each group are presented as means  $\pm$  SEM, with data collected from both hemispheres of each monkey.

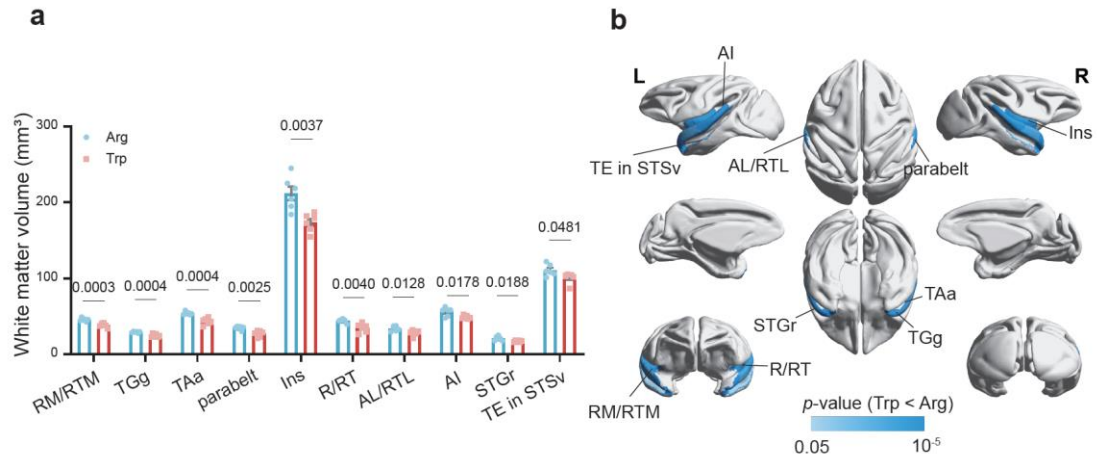

**Supplementary Fig. 9: White matter volume differences in temporal regions.** **a**, Bar plots with individual data points of detail temporal brain regions exhibiting significant differences in white matter volume between Trp-bearing macaques (n=3) and Arg controls (n=3). **b**, Visualization of temporal brain regions showing significant differences between Trp-bearing macaques and Arg controls on the mid-gray surfaces of the macaque template. Blue color indicates the white matter volume of Trp-bearing macaques is smaller than Arg controls. The significance of structural difference at region level were measured using GLMMs and all structural data were corrected with the intracranial volume of the corresponding hemisphere. Quantitative data from each group are presented as means  $\pm$  SEM, with data collected from both hemispheres of each monkey.



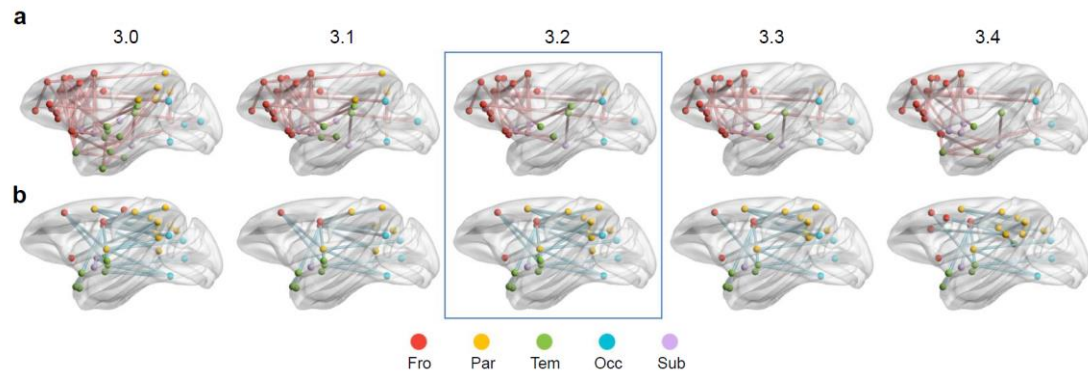

**Supplementary Fig. 10: Comparisons of NBS results.** **a**, Increased functional connectivity observed in Trp-bearing macaques compared to Arg controls across a threshold range from  $t = 3.0$  to  $t = 3.4$ . **b**, Decreased functional connectivity observed in Trp-bearing macaques compared to Arg controls across a threshold range from  $t = 3.0$  to  $t = 3.4$ . The results at the median threshold ( $t = 3.2$ ) were highlighted. Fro: frontal lobe; Par: parietal lobe; Tem: temporal lobe; Occ: occipital lobe; Sub: subcortical area.



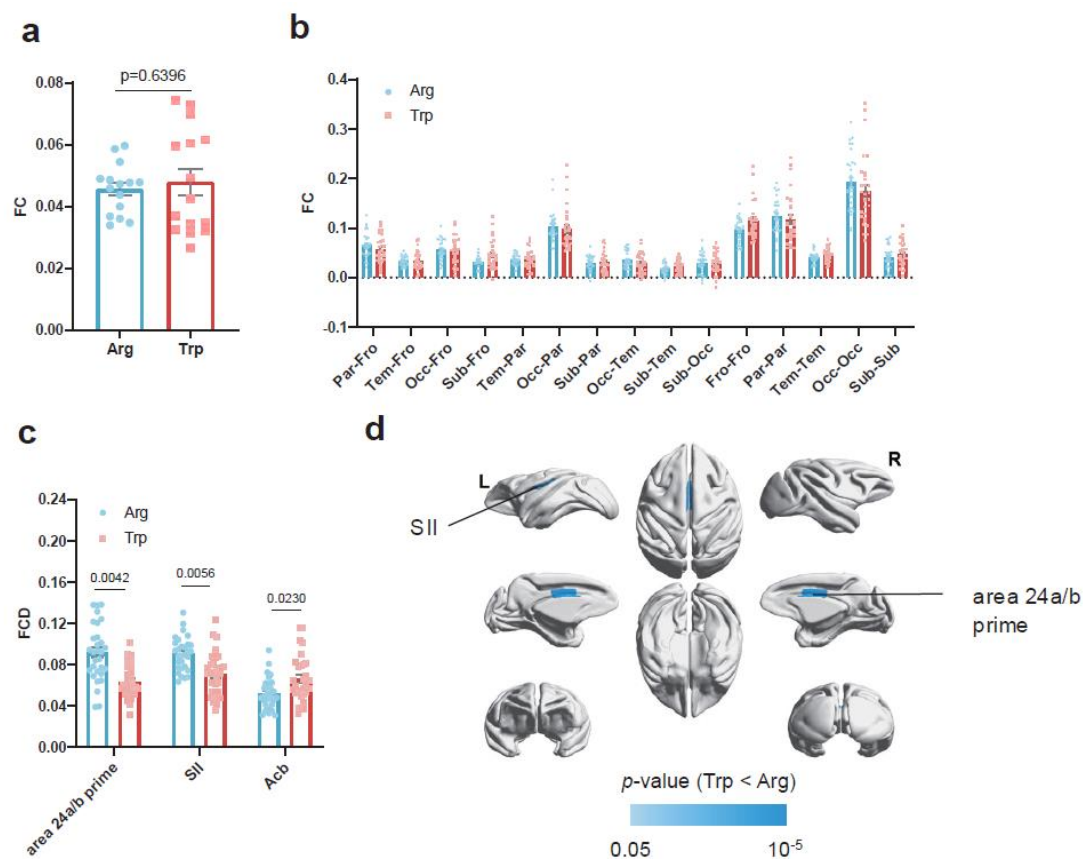

**Supplementary Fig. 11: Results of functional connectivity (FC) analyses.** **a.** Mean FC at the whole-brain level. **b.** Differences in FC between brain lobes in Trp macaques (n=3) and controls (n=3). **c.** Functional connectivity density (FCD) for regions showing significant differences between Trp macaques and controls. **d.** Visualization of the cortical regions identified in c on the mid-gray surfaces of the macaque brain template. Red indicates regions where FCD is higher in Trp macaques than in controls; blue indicates regions where FCD is lower. Bars are presented as means  $\pm$  SEMs. SII: secondary somatosensory cortex, area 24a/b prime: areas 24a' and 24b', Acb: accumbens. Quantitative data from each group are presented as means  $\pm$  SEM, with data collected from five segments of each monkey. GLMM analyses were performed.

212 **Supplementary Table 1.** Enrichment results of the very common (MAF > 0.05) pLoF genes. The corrected p-value were estimated by Benjamini–Hochberg  
213 algorithm.

| Source | Term name              | Term ID    | Corrected <i>p</i> -value | Term size | Query size | Intersection size | Intersections                                                                                                                                                                                                           |
|--------|------------------------|------------|---------------------------|-----------|------------|-------------------|-------------------------------------------------------------------------------------------------------------------------------------------------------------------------------------------------------------------------|
| KEGG   | Olfactory transduction | KEGG:04740 | 0.000180904               | 303       | 68         | 13                | <i>OR6Y1</i> , <i>ENSMMUG00000052449</i> ,<br><i>OR4E2</i> , <i>OR4F6</i> , <i>OR8A1</i> , <i>OR1E2</i> ,<br><i>OR9A4</i> , <i>OR6C4</i> , <i>OR2J3</i> , <i>OR4D11</i> ,<br><i>OR8B4</i> , <i>OR2D2</i> , <i>OR5A1</i> |

214  
215

**Supplementary Table 2.** Enrichment results of the rare (MAF < 0.01) pLoF genes. The corrected p-value were estimated by Benjamini–Hochberg algorithm.

| Source | Term name                      | Term ID    | Corrected <i>p</i> -value | Term size | Query size | Intersection size | Intersections                                                                                                                                                                                                                                                                                                                            |
|--------|--------------------------------|------------|---------------------------|-----------|------------|-------------------|------------------------------------------------------------------------------------------------------------------------------------------------------------------------------------------------------------------------------------------------------------------------------------------------------------------------------------------|
| KEGG   | Motor proteins                 | KEGG:04814 | 0.002381394               | 182       | 959        | 43                | <i>KIF14, DNAH1, MYH15, DYNC1H1, KIF13A, DNAH5, MYO3A, MYH7B, MYO1A, DNAH10, MYO3B, MYO7A, KIF24, DNAH2, MYH4, DNAH9, MYO15A, MYO19, MYO1F, TNNT1, KIFC3, MYO1G, KIF20B, KIF5C, KIF18A, DYNC2H1, DCTN3, ENSMMUG00000013436, CENPE, TUBA8, MYO1H, DNAH6, KIF18B, KLC3, KIF9, MYO5A, DNAI2, TUBA4A, KIF2B, STARD9, KIF19, TUBE1, MYO7B</i> |
| KEGG   | Arachidonic acid metabolism    | KEGG:00590 | 0.015385453               | 63        | 959        | 19                | <i>PLA2G4B, PLA2G4D, PLA2G4F, PTGR2, AKR1C8, CYP2C19, ENSMMUG00000020999, ALOX12, PLA2G4C, PLA2G3, LTA4H, PLB1, ENSMMUG00000012749, ALOX5, ALOX15, EPHX2, PRXL2B, CYP2U1, CYP2J2</i>                                                                                                                                                     |
| KEGG   | Serotonergic synapse           | KEGG:04726 | 0.023845159               | 111       | 959        | 27                | <i>CACNA1S, HTR3E, GNAI2, PLA2G4B, PLA2G4D, PLA2G4F, CYP2C19, MAPK1, TPH2, HTR3B, ALOX12, PLA2G4C, HTR1B, CACNA1C, GNB3, PRKCA, HTR3C, PLCB2, SLC18A1, ALOX5, ALOX15, RAPGEF3, ITPR2, CYP2J2, KCNJ9, MAOB, GNB2</i>                                                                                                                      |
| KEGG   | Glycerophospholipid metabolism | KEGG:00564 | 0.025514799               | 96        | 959        | 24                | <i>DGKG, DGKI, PLA2G4B, PLA2G4D, PLA2G4F, PLD4, LPIN3, GPAT2, PLD2, LPIN2, PLA2G4C, LPCAT2, DGKK, PLD1, CDS1, PLA2G3, PLB1,</i>                                                                                                                                                                                                          |

|      |                    |            |             |      |     |     |                                                                                                                                                                                                                                                                                                                                                                                                                                                                                                                                                                                                                                                                                                                                                                                                                                                                                             |
|------|--------------------|------------|-------------|------|-----|-----|---------------------------------------------------------------------------------------------------------------------------------------------------------------------------------------------------------------------------------------------------------------------------------------------------------------------------------------------------------------------------------------------------------------------------------------------------------------------------------------------------------------------------------------------------------------------------------------------------------------------------------------------------------------------------------------------------------------------------------------------------------------------------------------------------------------------------------------------------------------------------------------------|
|      |                    |            |             |      |     |     | <i>PLA2G15, DGKA, PNPLA7, PLPP5, PLA1A, DGKQ, DGKD</i>                                                                                                                                                                                                                                                                                                                                                                                                                                                                                                                                                                                                                                                                                                                                                                                                                                      |
| KEGG | Metabolic pathways | KEGG:01100 | 0.036130079 | 1500 | 959 | 218 | <i>ALDH9A1, ADCY10, FMO2, FMO4, PRDX6, PFKFB2, ASH1L, NPR1, CHIA, GSTM2, TNNI3K, ALG6, HYI, SDHB, GALNT15, DGKG, NIT2, ENSMMUG00000057255, GART, CYP2W1, MOGAT3, HYAL4, DGKI, ATP6V0A4, NOS3, GSTA4, PLA2G7, ENPP4, PPT2, CYP21A2, UGT2A1, ENSMMUG00000014773, ADH4, AGXT2, BHMT2, P4HA2, HK3, PLA2G4B, PLA2G4D, PLA2G4F, GANC, HDC, COQ6, DGLUCY, CKB, PLD4, CA1, NAPRT, ENSMMUG00000000958, AKR1C8, PAPSS2, PLCE1, CYP2C19, CYP17A1, NAGA, ENSMMUG00000020999, UPB1, LPIN3, ACOT8, PIK3C2G, GYS2, GLS2, ENSMMUG00000003763, GNS, TPH2, ALDH1L2, PGAP1, AOX1, GPAT2, ENSMMUG00000042838, ALDH3B1, LARGE2, EXT2, PDE3B, TREH, DBH, RALGDS, ALDH1B1, GLDC, SRR, PLD2, ALOX12, SAT2, ACACA, MTMR4, ATP6V0A1, G6PC3, ENPP7, ATP5F1A, ENOSF1, LPIN2, PLA2G4C, DHDH, ENSMMUG00000009003, LPCAT2, DGKK, IDH3G, BPNT1, CA14, CA6, PLD1, ACY1, UROC1, PFKL, QRSL1, SIRT5, CDS1, MGAT4D, GALNT7,</i> |

CKMT2, CYP11A1, GMPR2, IDO2, OGDHL,  
ASAH2, ALDH18A1, PNLIPRP3, PNPLA3,  
PLA2G3, ADA2, ACSM4,  
ENSMUG00000060449, LTA4H, PLB1, DHCR7,  
APIP, NT5C3B, AOC2, ACOX1, AANAT, PIGN,  
ASPDH, LDHD, HAO2, AKR1A1, GPX1, SETMAR,  
VNN2, COQ3, ACOT12, PLCB2, SEPHS1, ALOX5,  
OAT, CERS5, DGKA, PIKFYVE, NDUFS8,  
HSD17B12, MOGAT2, AASDHPPT, ALOX15,  
MPPE1, ACSM1, GUCY2F,  
ENSMUG00000029649, FTCD, ELOVL7, DLST,  
NDUFA6, SDS, GALNT5, UPP2, CHPF, ARAP1,  
PFAS, GALNS, GALNT11, PHYKPL, EPHX2,  
IDO1, HKDC1, SDSL, GATC, ATP6V0A2, AACS,  
P4HA3, BAAT, GRHPR, SHPK, INPP5B, PRXL2B,  
ENSMUG00000046437, GPLD1, DGKQ,  
ENSMUG00000000337, CYP2U1, GATB,  
DMGDH, NANP, HSD17B6,  
ENSMUG00000042063, DGKD, NTPCR,  
CYP2J2, HNMT, CTH, ENSMUG00000011916,  
UGT2A3, ADH1A, GUCY1A1, CBR4, DPYS,  
ENSMUG00000047658, AHCY, SMPD1, STT3A,  
MAOB, ENSMUG00000020740, ACOX3, OLAH,  
TYRPI, ST3GAL1, NT5DC4, LDHAL6A, NQO1,  
FGGY, IMPA1

|      |                              |            |             |    |     |    |                                                                                                                                                                                       |
|------|------------------------------|------------|-------------|----|-----|----|---------------------------------------------------------------------------------------------------------------------------------------------------------------------------------------|
| KEGG | Glycerolipid metabolism      | KEGG:00561 | 0.043042595 | 63 | 959 | 17 | <i>ALDH9A1, DGKG, MOGAT3, DGKI, LPIN3, GPAT2, ALDH1B1, LPIN2, DGKK, PNLIPRP3, PNPLA3, AKRIA1, DGKA, MOGAT2, PLPP5, DGKQ, DGKD</i>                                                     |
| KEGG | Choline metabolism in cancer | KEGG:05231 | 0.043042595 | 97 | 959 | 23 | <i>SLC44A3, DGKG, DGKI, EGF, PDGFC, PLA2G4B, PLA2G4D, PLA2G4F, MAPK1, RALGDS, PLD2, SLC44A2, PLA2G4C, DGKK, PLD1, PRKCA, MAP2K2, DGKA, WAS, PDGFB, DGKQ, DGKD, ENSMMUG00000054705</i> |

---

217

218

219 **Supplementary Table 3.** Anthropometric body measurement and the standards of how to measure.

| Full Name             | Measurement Standard                                                                                                         |
|-----------------------|------------------------------------------------------------------------------------------------------------------------------|
| Head Length           | Measurement from the middle of eyebrows to the furthest point on the back of head                                            |
| Head Width            | Measurement the widest distance about one inch above each ear                                                                |
| Head Girth            | Measure from the eyebrows and around the back at the biggest part of head                                                    |
| Torso Length          | Measure from the base of neck (the most top cervical vertebra), down the curve of back, and end at the proximal base of tail |
| Sitting Height        | Measurement from the highest point of the head to the base siting surface when sit up straight                               |
| Waist Girth           | Measurement around the level of umbilicus (belly button)                                                                     |
| Hip Girth             | Measurement around the level of ischial callosity                                                                            |
| Full-arm Length(left) | Measurement from the upper edge of the shoulder to the tip of middle finger                                                  |
| Full-leg Length(left) | Measurement from the upper edge of the iliac crest to the tip of middle toe.                                                 |
| Tail Length           | Measurement from the proximal base of tail to the distal end of the last tail vertebra (excluding protruding hairs)          |
| Body Length           | Measurement from the highest point of the head to the proximal base of tail                                                  |

220

221

**Supplementary Table 4.** Hematological and biochemical traits measured in this study.

| <b>Full Name</b>              | <b>Abbreviations</b> |
|-------------------------------|----------------------|
| Body Mass Index               | BMI                  |
| Waist To Hip Ratio            | WHR                  |
| Aspartate Aminotransferase    | AST                  |
| Creatine Kinase               | CK                   |
| Alanine Aminotransferase      | ALT                  |
| Gamma-Glutamyl Transpeptidase | GGT                  |
| Alkaline Phosphatase          | ALP                  |
| Total Bilirubin               | TBIL                 |
| Total Protein                 | TP                   |
| Albumin                       | ALB                  |
| Globulin                      | GLO                  |
| Albumin to Globulin Ratio     | A/G                  |
| Glucose                       | GLU                  |
| Total Cholesterol             | TCHO                 |
| Triglyceride                  | TRIG                 |
| High-Density Lipoprotein      | HDL                  |
| Low-Density Lipoprotein       | LDL                  |
| Blood Urea Nitrogen           | BUN                  |
| Creatinine                    | CRE                  |
| White Blood Cell Count        | WBC                  |
| Neutrophile                   | NEU                  |
| Lymphocyte                    | LYM                  |
| Monocyte                      | MON                  |
| Eosinophilic Granulocyte      | EOS                  |



|                                                                   |         |
|-------------------------------------------------------------------|---------|
| Percentage of Neutrophils                                         | Per_NEU |
| Percentage of Lymphocyte                                          | Per_LYM |
| Percentage of Monocyte                                            | Per_MON |
| Percentage of Eosinophilic granulocyte                            | Per_EOS |
| Red Blood Cell Count                                              | RBC     |
| Hemoglobin                                                        | HGB     |
| Haematocrit                                                       | HCT     |
| Mean Corpuscular Volume                                           | MCV     |
| Mean Corpuscular Hemoglobin                                       | MCH     |
| Mean Corpuscular Hemoglobin Concentration                         | MCHC    |
| Red Blood Cell Volume Distribution Width Coefficient of Variation | RDW-CV  |
| Red Blood Cell Volume Distribution Width Standard Deviation       | RDW-SD  |
| Platelet Count                                                    | PLT     |
| Mean Platelet Volume                                              | MPV     |
| Platelet Volume Distribution Width                                | PDW     |
| Plateletcrit                                                      | PCT     |

---

223

224

225 **Supplementary Table 5.** Associations of rare pLoF variants with the phenotypic traits ( $p$ -value  $< 1 \times 10^{-4}$ ) that were estimated by a mixed linear model-based  
 226 (GCTA-MLMA) analysis.

| Phenotypic trait | Chromosome | Position  | Reference allele | Alternative allele | Variant type            | Association $p$ -value | Gene Symbol    |
|------------------|------------|-----------|------------------|--------------------|-------------------------|------------------------|----------------|
| Full-leg Length  | chr2       | 99531286  | CT               | C                  | splice_acceptor_variant | 8.97E-06               | <i>ANO10</i>   |
| Body Weight      | chr15      | 8935286   | T                | C                  | splice_acceptor_variant | 9.67E-06               | <i>PRRC2B</i>  |
| LYM              | chr7       | 69202291  | G                | C                  | start_lost              | 1.08E-05               | <i>ZNF774</i>  |
| ALT              | chr14      | 57003122  | GT               | G                  | frameshift_variant      | 1.23E-05               | <i>TRIM66</i>  |
| Tail Length      | chr4       | 11338934  | A                | AT                 | frameshift_variant      | 1.60E-05               | <i>FNDC1</i>   |
| HDL              | chr17      | 17697910  | ACT              | A                  | frameshift_variant      | 2.09E-05               | <i>STOML3</i>  |
| HDL              | chr3       | 644408    | CAGACG           | C                  | frameshift_variant      | 2.79E-05               | <i>FTCD</i>    |
| RDW_SD           | chr7       | 41477989  | G                | A                  | splice_donor_variant    | 3.10E-05               | <i>ANKDD1A</i> |
| Full-arm Length  | chr2       | 99531286  | CT               | C                  | splice_acceptor_variant | 4.12E-05               | <i>ANO10</i>   |
| Waist Girth      | chr2       | 105934945 | CCT              | C                  | frameshift_variant      | 4.94E-05               | <i>UBA7</i>    |
| ALP              | chr1       | 181763800 | CAT              | C                  | frameshift_variant      | 5.75E-05               | <i>TMEM269</i> |
| LDL              | chr16      | 4465789   | G                | A                  | stop_gained             | 6.02E-05               | <i>ALOX15</i>  |
| MCH              | chr16      | 46621405  | C                | A                  | splice_donor_variant    | 6.36E-05               | <i>SGCA</i>    |
| TBIL             | chr6       | 93622223  | G                | A                  | stop_gained             | 7.04E-05               | <i>ERAP1</i>   |
| Full-arm Length  | chr18      | 49528838  | G                | A                  | stop_gained             | 7.52E-05               | <i>CCDC178</i> |
| HDL              | chr16      | 4465789   | G                | A                  | stop_gained             | 7.89E-05               | <i>ALOX15</i>  |
| ALP              | chr5       | 57847969  | AG               | A                  | frameshift_variant      | 8.02E-05               | <i>PPEF2</i>   |
| TRIG             | chr16      | 3403757   | C                | T                  | stop_gained             | 9.23E-05               | <i>SHPK</i>    |
| Head Length      | chr2       | 44680104  | G                | C                  | stop_gained             | 9.26E-05               | <i>ATR</i>     |
| Head Length      | chr20      | 68189247  | GGT              | G                  | frameshift_variant      | 9.26E-05               | <i>PKD1L2</i>  |

229 **Supplementary Table 6.** GWAS results of the 30 independent loci that surpassed the genome-wide significance threshold ( $5.13 \times 10^{-8}$ ). The threshold was was  
 230 estimated by using a uniform threshold of  $1/n$ , where  $n$  is the effective number of independent variants. PVE represents the proportion of variance in the phenotype  
 231 explained by a given SNP. Chr, chromosome; Pos, position; Ref, reference allele; Alt, alternative allele; AF, allele frequency.

| Chr   | Pos       | Ref | Alt | AF      | Variant type                | Gene<br>symbol             | Phenoty<br>pic trait | Index<br>_beta    | Index<br>_se | Index_p      | PVE<br>(%) | Study<br>Accession | Reference                                                                                                      |
|-------|-----------|-----|-----|---------|-----------------------------|----------------------------|----------------------|-------------------|--------------|--------------|------------|--------------------|----------------------------------------------------------------------------------------------------------------|
| chr2  | 195176108 | C   | T   | 0.01261 | intron_variant              | ROBO2                      | ALP                  | 1.106<br>99       | 1.92E-<br>01 | 8.05E-<br>09 | 4.55       |                    |                                                                                                                |
| chr4  | 126491691 | C   | T   | 0.03235 | intron_variant              | BICRAL                     | ALP                  | -<br>0.687<br>026 | 1.24E-<br>01 | 2.87E-<br>08 | 4.22       |                    |                                                                                                                |
| chr10 | 93895076  | T   | C   | 0.01096 | intergenic_reg<br>ion       | NPEPL1-<br>none            | ALP                  | 1.021<br>48       | 1.86E-<br>01 | 3.72E-<br>08 | 4.16       |                    |                                                                                                                |
| chr13 | 105052995 | C   | T   | 0.01151 | intron_variant              | DCDC2C                     | ALP                  | 1.066<br>49       | 1.92E-<br>01 | 2.86E-<br>08 | 4.22       | GCST006016         | Genetic analysis of quantitative traits in the Japanese population links cell types to complex human diseases. |
| chr8  | 125789207 | G   | A   | 0.03618 | downstream_<br>gene_variant | TRIB1                      | ALT                  | -<br>0.891<br>419 | 1.53E-<br>01 | 6.30E-<br>09 | 4.65       | GCST900118<br>98   | Genome-wide association study of serum liver enzymes implicates diverse metabolic and liver pathology          |
| chr19 | 13207806  | T   | C   | 0.09265 | intron_variant              | ENSMMUG<br>0000005623<br>3 | ALT                  | -<br>0.551<br>236 | 9.65E-<br>02 | 1.11E-<br>08 | 4.50       |                    |                                                                                                                |
| chr6  | 80719770  | C   | T   | 0.01096 | downstream_<br>gene_variant | EDIL3                      | BMI                  | -<br>1.073<br>65  | 1.96E-<br>01 | 4.17E-<br>08 | 4.97       | GCST902556<br>21   | Genomics and phenomics of body mass index reveals a complex disease network.                                   |

|       |           |   |    |         |                       |                             |                    |                   |              |              |      |            |                                                                                              |
|-------|-----------|---|----|---------|-----------------------|-----------------------------|--------------------|-------------------|--------------|--------------|------|------------|----------------------------------------------------------------------------------------------|
| chr5  | 171233903 | A | G  | 0.2012  | intergenic_region     | <i>HAND2-<br/>none</i>      | CHOL               | 0.365<br>217      | 6.60E-<br>02 | 3.07E-<br>08 | 4.21 | GCST007380 | Biomarker and genomic risk factors for liver function test abnormality in hazardous drinkers |
| chr8  | 143539082 | G | C  | 0.07292 | upstream_gene_variant | <i>ZNF696</i>               | EOS                | -<br>0.532<br>782 | 9.66E-<br>02 | 3.48E-<br>08 | 3.39 |            |                                                                                              |
| chr10 | 28427768  | C | T  | 0.07511 | intron_variant        | <i>GGT1</i>                 | GGT                | -<br>0.555<br>16  | 9.97E-<br>02 | 2.59E-<br>08 | 4.25 |            |                                                                                              |
| chr10 | 28504973  | C | T  | 0.1245  | 5_prime_UTR_variant   | <i>IGLL1</i>                | GGT                | 0.528<br>919      | 7.94E-<br>02 | 2.76E-<br>11 | 5.97 |            |                                                                                              |
| chr3  | 143212415 | A | T  | 0.03618 | intron_variant        | <i>ST7</i>                  | Head<br>Length     | -<br>0.741<br>429 | 1.36E-<br>01 | 4.57E-<br>08 | 4.94 |            |                                                                                              |
| chr3  | 158119742 | A | G  | 0.01096 | intergenic_region     | <i>none-<br/>PLXNA4</i>     | Head<br>Length     | -<br>1.410<br>45  | 2.46E-<br>01 | 9.52E-<br>09 | 5.42 |            |                                                                                              |
| chr16 | 4059616   | T | C  | 0.01919 | 3_prime_UTR_variant   | <i>UBE2G1</i>               | Head<br>Length     | -<br>0.960<br>899 | 1.72E-<br>01 | 2.29E-<br>08 | 5.15 |            |                                                                                              |
| chr17 | 21316584  | G | A  | 0.03947 | intergenic_region     | <i>TNFSF11-<br/>FAM216B</i> | Head<br>Width      | -<br>0.675<br>899 | 1.23E-<br>01 | 4.13E-<br>08 | 4.97 |            |                                                                                              |
| chr3  | 579267    | G | GA | 0.01206 | intron_variant        | <i>LSS</i>                  | Full-leg<br>Length | -<br>1.197<br>45  | 2.17E-<br>01 | 3.48E-<br>08 | 5.09 |            |                                                                                              |

|       |           |    |   |         |                       |                                                           |                    |                   |              |              |      |
|-------|-----------|----|---|---------|-----------------------|-----------------------------------------------------------|--------------------|-------------------|--------------|--------------|------|
| chr5  | 31285438  | G  | A | 0.1053  | intergenic_region     | ENSMMUG<br>0000006311<br>1-<br>ENSMMUG<br>0000005541<br>6 | Full-leg<br>Length | -<br>0.460<br>661 | 8.27E-<br>02 | 2.57E-<br>08 | 5.19 |
| chr7  | 131534200 | G  | A | 0.04496 | synonymous_variant    | ERH                                                       | Full-leg<br>Length | -<br>0.630<br>373 | 1.14E-<br>01 | 3.24E-<br>08 | 5.11 |
| chr2  | 134353857 | T  | G | 0.01151 | intron_variant        | CNTN4                                                     | Hip<br>Girth       | -<br>1.154<br>99  | 2.11E-<br>01 | 4.11E-<br>08 | 5.04 |
| chr20 | 13164913  | GC | G | 0.03564 | intron_variant        | SHISA9                                                    | Hip<br>Girth       | -<br>0.669<br>311 | 1.22E-<br>01 | 3.69E-<br>08 | 5.07 |
| chr15 | 96287434  | A  | G | 0.04989 | intron_variant        | ENSMMUG<br>0000003795<br>5                                | NEU                | 0.689<br>904      | 1.25E-<br>01 | 3.38E-<br>08 | 3.40 |
| chr11 | 129838296 | C  | T | 0.06963 | intergenic_region     | TMEM132D<br>-none                                         | PCT                | 0.569<br>107      | 1.03E-<br>01 | 3.04E-<br>08 | 3.41 |
| chr14 | 9179447   | G  | T | 0.01754 | upstream_gene_variant | ENSMMUG<br>0000005839<br>1                                | PCT                | 1.143<br>84       | 0.204<br>782 | 2.33E-<br>08 | 3.47 |
| chr7  | 159623299 | C  | T | 0.1519  | intergenic_region     | ENSMMUG<br>0000006442                                     | PDW                | 0.397<br>776      | 7.11E-<br>02 | 2.20E-<br>08 | 3.48 |

GCST008162 Whole-Genome Sequencing  
Coupled to Imputation  
Discovers Genetic Signals for  
Anthropometric Traits

|       |           |    |   |         |                         |                                                           |                |       |        |        |      |  |
|-------|-----------|----|---|---------|-------------------------|-----------------------------------------------------------|----------------|-------|--------|--------|------|--|
|       |           |    |   |         |                         | 5-<br>ENSMMUG<br>0000004732<br>5                          |                |       |        |        |      |  |
| chr8  | 69026307  | A  | G | 0.03728 | intron_variant          | C8H8orf34                                                 | PDW            | -     | 1.41E- | 1.97E- | 3.50 |  |
|       |           |    |   |         |                         |                                                           |                | 0.788 | 01     | 08     |      |  |
|       |           |    |   |         |                         |                                                           |                | 873   |        |        |      |  |
| chr1  | 206962087 | A  | T | 0.01042 | intergenic_region       | ACTL8-<br>ARHGEF10<br>L                                   | RDW-<br>SD     | -     | 2.47E- | 3.99E- | 3.36 |  |
|       |           |    |   |         |                         |                                                           |                | 1.355 | 01     | 08     |      |  |
|       |           |    |   |         |                         |                                                           |                | 29    |        |        |      |  |
| chr12 | 70820006  | TA | T | 0.02083 | intergenic_region       | ENSMMUG<br>0000005233<br>9-<br>ENSMMUG<br>0000006149<br>1 | Waist<br>Girth | -     | 1.65E- | 4.37E- | 5.01 |  |
|       |           |    |   |         |                         |                                                           |                | 0.902 | 01     | 08     |      |  |
|       |           |    |   |         |                         |                                                           |                | 453   |        |        |      |  |
|       |           |    |   |         |                         |                                                           |                |       |        |        |      |  |
| chr15 | 106990683 | A  | T | 0.01371 | downstream_gene_variant | Unknown                                                   | Waist<br>Girth | -     | 2.30E- | 2.34E- | 5.21 |  |
|       |           |    |   |         |                         |                                                           |                | 1.286 | 01     | 08     |      |  |
|       |           |    |   |         |                         |                                                           |                | 57    |        |        |      |  |
| chr1  | 140712384 | C  | T | 0.02138 | intergenic_region       | ENSMMUG<br>0000005777<br>2-<br>ENSMMUG<br>0000005513<br>4 | Body<br>Weight | -     | 1.11E- | 2.29E- | 5.15 |  |
|       |           |    |   |         |                         |                                                           |                | 0.622 | 01     | 08     |      |  |
|       |           |    |   |         |                         |                                                           |                | 9     |        |        |      |  |

|       |          |   |   |        |                |             |             |          |          |          |      |              |                                                                                                                                |
|-------|----------|---|---|--------|----------------|-------------|-------------|----------|----------|----------|------|--------------|--------------------------------------------------------------------------------------------------------------------------------|
| chr20 | 65890799 | T | C | 0.0466 | intron_variant | <i>WWOX</i> | Body Weight | 0.390931 | 7.11E-02 | 3.87E-08 | 4.99 | GCST90277421 | Interactions between genetic variants and environmental risk factors are associated with the severity of pelvic organ prolapse |
|-------|----------|---|---|--------|----------------|-------------|-------------|----------|----------|----------|------|--------------|--------------------------------------------------------------------------------------------------------------------------------|

---

232  
233

**Supplementary Table 7.** The neurological function scoring table for the macaques.

| <b>Behavioral category</b>                                                                                   |                                                                                         | <b>Score</b> |
|--------------------------------------------------------------------------------------------------------------|-----------------------------------------------------------------------------------------|--------------|
| <b>1 Motor system (0-16)</b>                                                                                 |                                                                                         |              |
| 1.1 <i>Hand flexibility when feeding</i>                                                                     | Normal                                                                                  | 0            |
|                                                                                                              | Slightly reduced, slowly get food by itself                                             | 2            |
|                                                                                                              | Moderately reduced, hard but still get food by itself                                   | 4            |
|                                                                                                              | Severely reduced, must be fed by the experimenter                                       | 6            |
| 1.2 <i>Upper limb reflex (slightly touched by a stick)</i>                                                   | Fiercely push, pull or bite the stick                                                   | 0            |
|                                                                                                              | Slightly push or pull the stick                                                         | 3            |
|                                                                                                              | Neither push or pull but defend with body                                               | 4            |
|                                                                                                              | Absent, no movement                                                                     | 5            |
| 1.3 <i>Lower limb reflex (slightly touched by a stick)</i>                                                   | Fiercely push, pull or bite the stick                                                   | 0            |
|                                                                                                              | Slightly push or pull the stick                                                         | 3            |
|                                                                                                              | Neither push or pull but defend with body                                               | 4            |
|                                                                                                              | Absent, no movement                                                                     | 5            |
| <b>2 Skeletal muscle coordination (0-9)</b>                                                                  |                                                                                         |              |
| 2.1 <i>Overall body movement</i>                                                                             | Normal                                                                                  | 0            |
|                                                                                                              | Slowly walk or move                                                                     | 3            |
|                                                                                                              | Spontaneously stand, but unable to walk                                                 | 4            |
| 2.2 <i>Bounce reflex (a stick was slightly swept at the bottom of the monkey's cage by the experimenter)</i> | Rapidly escape or jump to the upper part of the cage                                    | 0            |
|                                                                                                              | Defend by holding the stick, but unable to escape or jump to the upper part of the cage | 2            |
|                                                                                                              | Absent, no movement                                                                     | 5            |
| <b>3 Sensory system (0-25)</b>                                                                               |                                                                                         |              |
|                                                                                                              | Rapidly withdraw, threat with anger                                                     | 0            |



|                                                                            |                                                                       |   |
|----------------------------------------------------------------------------|-----------------------------------------------------------------------|---|
| 3.1 <i>Finger pain reflex</i><br>(Slightly clipped with a<br>tweezer)      | Withdraw, without anger                                               | 1 |
|                                                                            | Slowly withdraw                                                       | 3 |
|                                                                            | Absent, no movement                                                   | 5 |
| 3.2 <i>Toe pain reflex</i><br>(Slightly clipped with a<br>tweezer)         | Rapidly withdraw, threat with anger                                   | 0 |
|                                                                            | Withdraw, without anger                                               | 1 |
|                                                                            | Slowly withdraw                                                       | 3 |
|                                                                            | Absent, no movement                                                   | 5 |
| 3.3 <i>Facial sensation</i><br>(Slightly touched with a<br>brush)          | Quickly escape, shake head or threat with anger                       | 0 |
|                                                                            | Face reacts to touch without body movement                            | 2 |
|                                                                            | No response                                                           | 5 |
| 3.4 <i>Auricle reflex (Slightly<br/>touched with a brush)</i>              | Quickly escape, shake head or threat with anger                       | 0 |
|                                                                            | Ear and facial muscles tremble, reacts to touch without body movement | 2 |
|                                                                            | No response                                                           | 5 |
| 3.5 <i>Abdominal pain reflex</i><br>(Slightly being touched by<br>a stick) | Fiercely push, pull or bite the stick                                 | 0 |
|                                                                            | Slightly push or pull the stick, defend with body                     | 2 |
|                                                                            | No response                                                           | 5 |

236

237 **Supplementary Table 8.** Abbreviations for subcortical brain regions.

| Abbreviation | Region Name                 |
|--------------|-----------------------------|
| LVPal        | lateral and ventral pallium |
| HF           | hippocampal formation       |
| Amy          | amygdala                    |
| Cd           | caudate                     |
| Pu           | putamen                     |
| Acb          | accumbens                   |
| Pd           | pallidum                    |
| Hy           | hypothalamus                |
| PreThal      | prethalamus                 |
| Thal         | thalamus                    |
| EpiThal      | epithalamus                 |
| PrT          | pretectum                   |
| Mid          | midbrain                    |

238

239

## Supplementary references

1. Cox, R.W. AFNI: software for analysis and visualization of functional magnetic resonance neuroimages. *Comput. Biomed. Res.* 29, 162-73 (1996).
2. Jenkinson, M., Beckmann, C.F., Behrens, T.E., Woolrich, M.W. & Smith, S.M. Fsl. *Neuroimage* 62, 782-90 (2012).
3. Avants, B.B., Tustison, N. & Song, G. Advanced normalization tools (ANTs). *Insight j* 2, 1-35 (2009).
4. Fischl, B. FreeSurfer. *Neuroimage* 62, 774-81 (2012).
5. Jung, B. *et al.* A comprehensive macaque fMRI pipeline and hierarchical atlas. *Neuroimage* 235, 117997 (2021).
6. Hartig, R. *et al.* The subcortical atlas of the rhesus macaque (SARM) for neuroimaging. *Neuroimage* 235, 117996 (2021).
7. Jo, H.J. *et al.* Effective preprocessing procedures virtually eliminate distance-dependent motion artifacts in resting state FMRI. *Journal of applied mathematics* 2013(2013).
8. Weissenbacher, A. *et al.* Correlations and anticorrelations in resting-state functional connectivity MRI: a quantitative comparison of preprocessing strategies. *Neuroimage* 47, 1408-1416 (2009).
9. Zalesky, A., Fornito, A. & Bullmore, E.T. Network-based statistic: identifying differences in brain networks. *Neuroimage* 53, 1197-207 (2010).
10. Xia, M., Wang, J. & He, Y. BrainNet Viewer: a network visualization tool for human brain connectomics. *PLoS One* 8, e68910 (2013).
